# Supplementary material
Source: publisher figshare collection journal article supplement (https://tandf.figshare.com/ndownloader/files/20469012)
Supplement: Supplementary file 1 [file 20469012]

## Sheet: Table S1
Supplementary Table S1 Agronomic traits at the seedling stage under low-phosphorus stress among 16 cultivars from nutrient solution culture in 2015 and 2016
Mean of agronomic traits in 2015
1 mM KH2PO4 (HP)	No.	Cultivar	PH	LN	SPAD	LA	RL	LB	SB	RB	AB	TB	SLW	RSR	LPA	SPA	RPA	APA	TPA	PEC	PUE	MDAC	SC
			(cm)			(cm2)	(cm)	(g)	(g)	(g)	(g)	(g)	(g cm2)		(mg)	(mg)	(mg)	(mg)	(mg)		(g mg-1)	(μmol g-1)	(mg g-1)
	Z1	Lu 54	12.4143	6	53.9	188.885	24.65	0.705	0.2075	0.305	0.9125	1.2175	0.00371722	0.338758	3.39297	0.586801	0.431467	3.97977	4.41123	9.25329	0.27647	20.7927	6.29865
	Z2	CCRI 50	14.8375	5.875	50.7375	177.585	27.4	0.65	0.2125	0.37	0.8625	1.2325	0.0036634	0.430523	2.27191	0.582533	0.427503	2.85445	3.28195	6.82416	0.375554	24.8754	4.48181
	Z3	Hannongmianzao 1	16	8	43	248.35	21.4	0.94	0.3	0.44	1.24	1.68	0.00378498	0.354839	2.87515	0.581877	0.744748	3.45703	4.20178	4.64188	0.399831	20.4013	7.11817
	Z4	Yu 068	14.45	5.375	46.075	172.397	22.725	0.615	0.2125	0.4	0.8275	1.2275	0.00356148	0.484544	1.27708	0.319885	0.384508	1.59697	1.98148	4.1492	0.619409	27.2905	9.27163
	Z5	Lu 7619	16.3	6.375	50	252.257	24.525	0.8425	0.27	0.465	1.1125	1.5775	0.00332153	0.439154	3.29094	0.196157	0.617348	3.4871	4.10445	5.93807	0.386419	13.8222	6.90027
	Z6	Yuzaomian 9110	18.1429	6.71429	46.6857	225.567	28.75	0.695	0.27	0.28	0.965	1.245	0.00298259	0.291505	4.71713	0.430343	0.427083	5.14747	5.57455	12.3387	0.22483	12.5191	6.58334
	Z7	Deltapine	13.1	7.75	44.35	207.963	25.675	0.64	0.2175	0.3375	0.8575	1.195	0.00311579	0.41276	2.29429	0.377265	0.421171	2.67155	3.09272	6.63432	0.388319	25.0194	9.34482
	Z8	De 0720	11.1	6	50.9	135.84	21.125	0.6025	0.1275	0.3675	0.73	1.0975	0.00440058	0.523818	1.11456	0.278697	0.551978	1.39325	1.94523	2.5609	0.56479	13.9507	5.78497
	Y1	CCRI 88	16.0714	6.85714	48.2857	143.3	21.725	0.49	0.1775	0.2775	0.6675	0.945	0.00343981	0.418911	2.10434	0.212207	0.253263	2.31654	2.56981	9.52892	0.370301	13.1087	6.47567
	Y2	CCRI 69	11.8714	5.42857	46.5429	164.36	22.425	0.525	0.1525	0.3325	0.6775	1.01	0.00319908	0.492425	2.28747	0.443261	0.338955	2.73073	3.06969	8.11986	0.329197	15.0968	6.04004
	Y3	CCRI 79	14.075	5.875	50.35	176.032	24.1	0.9325	0.1825	0.2525	1.115	1.3675	0.00526427	0.235437	4.74614	0.108389	0.380929	4.85453	5.23546	12.9353	0.262759	14.1302	6.77481
	Y4	Huamian 3109	15.875	6.75	41.45	213.165	26.75	0.6875	0.2475	0.345	0.935	1.28	0.00336469	0.371519	4.26522	0.103109	0.428745	4.36833	4.79708	10.5057	0.270514	11.1918	6.28578
	Y5	Lu 6269	11.1714	5.42857	47.3143	182.077	27.775	0.5375	0.1425	0.3375	0.68	1.0175	0.00293946	0.509011	3.31526	0.438464	0.490862	3.75372	4.24459	8.21775	0.240514	18.4569	8.67018
	Y6	Lumianyan 36	10.0714	5.14286	44.6714	124.787	24.3	0.3825	0.085	0.2475	0.4675	0.715	0.0030838	0.53258	2.6022	0.313049	0.299787	2.91525	3.21504	9.73939	0.222694	26.012	4.99872
	Y7	K836-1	15.1375	5.75	44.1875	182.477	20.825	0.555	0.2075	0.315	0.7625	1.0775	0.0030384	0.415489	1.84084	0.379809	0.539647	2.22065	2.76029	4.18463	0.390531	20.7007	6.9382
	Y8	K836-2	13.3	5.71429	47.8	158.74	21.475	0.4875	0.1575	0.3525	0.645	0.9975	0.00307382	0.546455	1.87042	0.0945	0.53293	1.87987	2.4128	3.5443	0.413581	18.5682	9.25938
0.01 mM KH2PO4 (LP)	No.	Cultivar	PH	LN	SPAD	LA	RL	LB	SB	RB	AB	TB	SLW	RSR	LPA	SPA	RPA	APA	TPA	PEC	PUE	MDAC	SC
			(cm)			(cm2)	(cm)	(g)	(g)	(g)	(g)	(g)	(g cm2)		(mg)	(mg)	(mg)	(mg)	(mg)		(g mg-1)	(μmol g-1)	(mg g-1)
	Z1	Lu 54	6.9	3.83333	44.1833	68.4433	21.6333	0.34	0.0733333	0.23	0.413333	0.643333	0.00498356	0.561175	0.164663	0.00789111	0.0941061	0.172554	0.26666	1.83993	2.41288	28.039	6.59917
	Z2	CCRI 50	9.78333	5	43.5333	98.14	28.6667	0.456667	0.13	0.286667	0.586667	0.873333	0.00465483	0.490959	0.270834	0.0113368	0.16226	0.282171	0.44443	1.74772	1.96618	22.435	6.66556
	Z3	Hannongmianzao 1	15.5	6	39.4	130.15	19.9	0.39	0.13	0.3	0.52	0.82	0.00299654	0.576923	0.638394	0.123099	0.209684	0.761493	0.971177	3.63162	0.844336	29.1233	8.69255
	Z4	Yu 068	8.75	4.5	40.6667	71.1333	25.8	0.33	0.0733333	0.21	0.403333	0.613333	0.00466707	0.535403	0.201257	0.0837798	0.120131	0.285036	0.405168	2.36782	1.51892	30.1998	6.99082
	Z5	Lu 7619	10.7333	5.16667	45.5833	114.227	25.2	0.513333	0.143333	0.323333	0.656667	0.98	0.00451905	0.521995	0.417425	0.16014	0.183271	0.577565	0.760837	3.17549	1.29011	18.0989	9.24466
	Z6	Yuzaomian 9110	13.5833	5.66667	46.55	173.3	26.3	0.7	0.196667	0.333333	0.896667	1.23	0.00407129	0.381321	0.455201	0.248213	0.323923	0.703413	1.02734	2.16295	1.20025	15.5677	5.76358
	Z7	Deltapine	14.9	6	46.05	198.2	18.25	0.66	0.23	0.21	0.89	1.1	0.00332481	0.241026	1.37235	0.392744	0.217915	1.76509	1.98301	8.16435	0.555268	28.4301	9.19713
	Z8	De 0720	7	4	48.6667	48.6933	23.3333	0.303333	0.0766667	0.363333	0.38	0.743333	0.0061232	1.04596	0.182	0.0417511	0.246936	0.223751	0.470687	0.926844	1.57789	31.3822	9.43245
	Y1	CCRI 88	10.6167	4.66667	36.7833	110.943	22	0.536667	0.12	0.263333	0.656667	0.92	0.00492865	0.397935	0.364945	0.0994932	0.137137	0.464438	0.601575	3.43677	1.52902	29.2904	11.3817
	Y2	CCRI 69	8.58333	4.33333	35.65	99.3	28.6667	0.483333	0.123333	0.35	0.606667	0.956667	0.00487769	0.583877	0.463777	0.0962271	0.193559	0.560004	0.753563	2.87	1.27166	26.6105	7.46499
	Y3	CCRI 79	8.38333	4.66667	38.95	106.04	24.5667	0.506667	0.14	0.24	0.646667	0.886667	0.00478494	0.371109	0.5196	0.119047	0.100116	0.638647	0.738763	6.70031	1.19889	27.8719	9.00672
	Y4	Huamian 3109	8.16667	4.5	30.4667	96.0033	22.7333	0.413333	0.116667	0.303333	0.53	0.833333	0.00431192	0.571624	0.361775	0.0638613	0.145817	0.425636	0.571453	2.96469	1.45761	33.8314	13.6722
	Y5	Lu 6269	6.31667	4.16667	47.2	86.64	26.9	0.4	0.0733333	0.243333	0.473333	0.716667	0.00463794	0.523602	0.52311	0.168179	0.144608	0.691288	0.835896	4.81842	0.859578	19.2734	10.3684
	Y6	Lumianyan 36	6.46667	4.16667	44.25	104.267	30.1667	0.42	0.0766667	0.253333	0.496667	0.75	0.00413344	0.514427	0.338825	0.0836131	0.190486	0.422438	0.612924	2.31048	1.22391	10.2491	6.71303
	Y7	K836-1	11.5	5.16667	44.35	127.183	27	0.496667	0.146667	0.201667	0.643333	0.845	0.00386988	0.515332	0.483118	0.209929	0.196604	0.693047	0.827003	3.84143	1.02542	27.456	8.86702
	Y8	K836-2	6.66667	3.83333	41.7667	66.4533	22.1667	0.33	0.0666667	0.236667	0.396667	0.633333	0.00510679	0.625825	0.46846	0.0586636	0.273607	0.527123	0.80073	2.05478	0.790971	27.4911	12.6666
Mean of agronomic traits in 2016
1 mM KH2PO4 (HP)	No.	Cultivar	PH	LN	SPAD	LA	RL	LB	SB	RB	AB	TB	SLW	RSR	LPA	SPA	RPA	APA	TPA	PEC	PUE	MDAC	SC
			(cm)			(cm2)	(cm)	(g)	(g)	(g)	(g)	(g)	(g cm2)		(mg)	(mg)	(mg)	(mg)	(mg)		(g mg-1)	(μmol g-1)	(mg g-1)
	Z1	Lu 54	16.6667	5	37.7333	109.06	21.1333	0.413333	0.186667	0.263333	0.6	0.863333	0.00370601	0.327778	2.0538	0.433816	0.580512	2.48761	3.06879	4.40143	0.275231	17.008	11.1873
	Z2	CCRI 50	16.845	5.33333	40.3667	97.09	21.0667	0.343333	0.169739	0.280869	0.500764	0.763747	0.00330633	0.475111	1.43666	0.410394	0.351428	1.84568	2.30225	3.79917	0.321495	13.1313	12.5611
	Z3	Hannongmianzao 1	19.8333	6	49.5667	109.608	17.7	0.533333	0.206862	0.408878	0.729413	1.10938	0.00478988	0.463661	1.62734	0.475291	1.11396	2.16377	2.87104	3.27412	0.366074	14.7184	12.2462
	Z4	Yu 068	16.9	4.73684	37.9333	90.7674	19.1333	0.456667	0.182237	0.349209	0.632185	0.996149	0.00467016	0.505136	1.68263	0.470392	0.48304	2.18758	2.87362	3.80037	0.329068	12.6631	11.4051
	Z5	Lu 7619	17.5667	5.18519	40.5667	120.108	21.7	0.296667	0.172389	0.347705	0.410433	0.84593	0.00261755	0.495677	1.5719	0.421068	0.379054	2.03802	2.40488	4.99029	0.397552	14.1171	12.3498
	Z6	Yuzaomian 9110	18.8	4.66667	49.3667	68.84	19.4333	0.283333	0.16	0.236667	0.447323	0.68	0.00409223	0.570827	0.877877	0.402168	0.352499	1.28005	1.63222	3.50447	0.415927	25.0567	8.49859
	Z7	Deltapine	14.1507	6	51.7	107.28	15.5	0.49	0.203741	0.362486	0.699281	1.05905	0.00374055	0.524192	1.80556	0.465541	0.417049	2.29761	2.69607	4.58821	0.373933	25.0194	9.34482
	Z8	De 0720	17.3939	5.2	38.8	76.172	21.5	0.346667	0.156766	0.427452	0.498606	0.944616	0.00463432	0.732769	1.38618	0.35955	0.703184	1.72632	2.65466	2.1941	0.341218	16.8322	11.1196
	Y1	CCRI 88	22.4667	6	53.5	95.9534	17.6333	0.413333	0.130699	0.149803	0.532609	0.671501	0.00383884	0.20712	1.66537	0.448973	0.380099	2.10188	2.45895	6.26205	0.270774	20.4013	7.11817
	Y2	CCRI 69	19.3	5.33333	45.4667	142.503	20.7667	0.416667	0.141406	0.199491	0.54967	0.732552	0.0025068	0.289084	2.04034	0.448694	0.337646	2.45049	2.80246	5.99869	0.254694	27.7953	10.8087
	Y3	CCRI 79	20.3483	5.74074	36	164.377	18.6	0.456667	0.1669	0.200124	0.617085	0.798826	0.00255526	0.277971	2.52464	0.536838	0.394714	3.04689	3.42338	6.90661	0.220154	16.6973	12.5041
	Y4	Huamian 3109	22.1333	5.33898	35.8333	147.289	20.4	0.401025	0.21712	0.250065	0.620823	0.86105	0.00278631	0.285737	2.5012	0.561616	0.508884	3.03197	3.6041	5.67987	0.245337	13.7274	11.0383
	Y5	Lu 6269	19.8333	5.56931	44.4667	135.085	17.8667	0.47	0.097114	0.150022	0.574203	0.680706	0.00286612	0.229583	1.74653	0.406998	0.408306	2.15152	2.52117	5.34544	0.228308	13.3842	10.6526
	Y6	Lumianyan 36	22.173	5.66667	45.9333	138.432	18.5	0.45	0.141647	0.184392	0.581927	0.749422	0.00303525	0.304235	1.89687	0.520448	0.345093	2.4932	2.75474	6.25367	0.249674	23.4555	16.3612
	Y7	K836-1	21.3333	6	55.2333	157.911	19.9	0.51	0.151867	0.167109	0.649156	0.79467	0.00298145	0.251813	1.92193	0.651243	0.245235	2.60066	2.77824	7.21802	0.280789	35.4265	9.1457
	Y8	K836-2	16.8016	5.13158	38.7667	128.922	22	0.406667	0.164342	0.266585	0.57315	0.819613	0.00306534	0.361296	1.56643	0.509981	0.413009	2.08678	2.47651	4.83693	0.320414	13.6492	17.2526
0.01 mM KH2PO4 (LP)	No.	Cultivar	PH	LN	SPAD	LA	RL	LB	SB	RB	AB	TB	SLW	RSR	LPA	SPA	RPA	APA	TPA	PEC	PUE	MDAC	SC
			(cm)			(cm2)	(cm)	(g)	(g)	(g)	(g)	(g)	(g cm2)		(mg)	(mg)	(mg)	(mg)	(mg)		(g mg-1)	(μmol g-1)	(mg g-1)
	Z1	Lu 54	10.2667	4	38.3	61.1067	19.9	0.333333	0.113333	0.196667	0.446667	0.643333	0.00545448	0.440299	0.488211	0.166786	0.191499	0.654997	0.845519	3.33869	0.765273	25.6371	16.8319
	Z2	CCRI 50	11.9	4.34568	38.3	68.0319	19.9667	0.303192	0.126667	0.236667	0.433728	0.666526	0.00485772	0.52304	0.4573	0.176676	0.244917	0.625503	0.8535	2.88853	0.78837	25.6416	14.5522
	Z3	Hannongmianzao 1	11.6754	4.96	48.9667	68.84	21.0333	0.46601	0.146667	0.33	0.618191	0.942676	0.00676946	0.500917	0.49909	0.196126	0.26151	0.705216	0.986726	2.50847	0.968315	24.3482	7.18437
	Z4	Yu 068	11.1213	4	35.2	59.1967	21.7	0.398625	0.136667	0.343333	0.54011	0.878625	0.00686186	0.66705	0.433816	0.188434	0.285466	0.62225	0.867716	2.87977	1.08795	35.6103	14.3299
	Z5	Lu 7619	12.4383	4.66667	35.6333	89.4833	20.4	0.332839	0.13	0.25	0.467004	0.712839	0.00352987	0.589298	0.581177	0.175577	0.221181	0.756754	0.967935	3.82142	0.708923	29.0253	13.3875
	Z6	Yuzaomian 9110	15.4	4	35.8333	57.07	20.2333	0.306667	0.156667	0.243333	0.467503	0.706667	0.00538894	0.488417	0.388322	0.18261	0.204504	0.570932	0.7765	2.70019	0.903314	29.1267	10.5725
	Z7	Deltapine	17.1903	5.42222	42.8	113.764	17.3333	0.548215	0.226667	0.346667	0.774882	1.12155	0.00525256	0.416064	0.788952	0.224257	0.324037	1.03972	1.33725	3.52683	0.8587	28.4301	9.19713
	Z8	De 0720	10.3624	4.33333	34.0667	43.59	20.5	0.296366	0.11	0.396667	0.410023	0.803033	0.0064522	0.994678	0.325026	0.147995	0.346893	0.473021	0.779914	1.66359	1.09941	36.8692	17.8292
	Y1	CCRI 88	17.5996	5.06667	36.2	79.1033	19.2	0.375073	0.11	0.12	0.489438	0.605073	0.00516829	0.254807	0.665242	0.194148	0.15272	0.84939	1.05211	4.82723	0.597833	29.2047	8.69255
	Y2	CCRI 69	13.7884	4.26667	39.1333	100.351	21.5333	0.376901	0.123333	0.17	0.504736	0.670234	0.00393988	0.343239	0.725351	0.199972	0.237994	0.925323	1.18332	4.58801	0.580141	36.9978	12.0736
	Y3	CCRI 79	14.9333	5.16667	29.3667	119.862	17.8	0.406442	0.14	0.173333	0.55136	0.719775	0.0036961	0.317203	0.740406	0.224038	0.198434	0.964444	1.16288	5.26028	0.63896	29.7963	11.4205
	Y4	Huamian 3109	13.3089	4.66667	38.0333	85.5467	16.2333	0.32	0.13	0.173333	0.45405	0.623333	0.00351247	0.381333	0.613703	0.228104	0.215247	0.841807	1.05705	4.31089	0.582689	21.5708	15.9756
	Y5	Lu 6269	13.9742	5	38.7667	113.189	20.3333	0.390245	0.0933333	0.14	0.483579	0.623579	0.00505535	0.298193	0.705571	0.193379	0.208324	0.89895	1.12727	4.11515	0.603166	27.4637	10.399
	Y6	Lumianyan 36	15.8	4.85714	31.5667	114.918	20.2	0.405465	0.136667	0.18	0.547011	0.722132	0.00450545	0.332023	0.879855	0.22162	0.290411	1.09147	1.34189	4.79281	0.558815	32.1776	9.08571
	Y7	K836-1	16.3434	5.37143	39.4667	125.897	21.5	0.467421	0.14	0.166667	0.612888	0.774087	0.00421817	0.274384	0.793812	0.282499	0.243928	1.07631	1.39024	5.51241	0.588324	29.6932	12.9018
	Y8	K836-2	11.91	4.33333	33.3667	76.89	22	0.340858	0.113333	0.196667	0.458279	0.650858	0.00420697	0.407024	0.464475	0.212775	0.196456	0.66725	0.843705	3.68733	0.759939	23.502	4.42955

## Sheet: Table S2
Supplementary Table S2 Coefficients of low-phosphorus stress among 16 cultivars from nutrient solution culture in 2015 and 2016
Coefficients of stress in 2015
No.	Cultivar	PH	LN	SPAD	LA	RL	LB	SB	RB	AB	TB	SLW	RSR	LPA	SPA	RPA	APA	TPA	PEC	PUE	MDAC	SC
Z1	Lu 54	0.444189	0.361111	0.180272	0.637645	0.12238	0.51773	0.646586	0.245902	0.547032	0.471595	-0.34067	-0.656566	0.951469	0.986552	0.781893	0.956642	0.93955	0.801159	-7.72745	-0.348504	-0.0477124
Z2	CCRI 50	0.340635	0.148936	0.141989	0.447363	-0.0462287	0.297436	0.388235	0.225225	0.319807	0.291413	-0.27063	-0.140379	0.88079	0.980539	0.620448	0.901147	0.864584	0.743892	-4.23541	0.0981054	-0.487246
Z3	Hannongmianzao 1	0.03125	0.25	0.0837209	0.475941	0.0700935	0.585106	0.566667	0.318182	0.580645	0.511905	0.208307	-0.625874	0.777962	0.788446	0.718449	0.779726	0.768865	0.217641	-1.11174	-0.427519	-0.221176
Z4	Yu 068	0.394464	0.162791	0.117381	0.587388	-0.135314	0.463415	0.654902	0.475	0.512588	0.500339	-0.31043	-0.104963	0.842409	0.738094	0.687572	0.821514	0.795522	0.429333	-1.45221	-0.106605	0.245999
Z5	Lu 7619	0.341513	0.189542	0.0883333	0.547182	-0.0275229	0.390702	0.469136	0.304659	0.409738	0.378764	-0.360533	-0.188637	0.873159	0.183611	0.703131	0.834371	0.814631	0.465232	-2.33862	-0.309411	-0.339754
Z6	Yuzaomian 9110	0.251312	0.156028	0.00290698	0.231716	0.0852174	-0.00719424	0.271605	-0.190476	0.0708117	0.0120482	-0.365017	-0.308111	0.9035	0.423221	0.241547	0.863348	0.81571	0.824701	-4.3385	-0.243523	0.124521
Z7	Deltapine	-0.137405	0.225806	-0.0383315	0.0469436	0.289192	-0.03125	-0.0574713	0.377778	-0.0379009	0.0794979	-0.0670855	0.416063	0.401842	-0.04103	0.482598	0.339301	0.358816	-0.230623	-0.429927	-0.136324	0.0158048
Z8	De 0720	0.369369	0.333333	0.0438769	0.641539	-0.104536	0.496542	0.398693	0.0113379	0.479452	0.322703	-0.391452	-0.996805	0.836706	0.850192	0.552634	0.839404	0.75803	0.638079	-1.79377	-1.24951	-0.630508
Y1	CCRI 88	0.339407	0.319444	0.238215	0.225797	-0.0126582	-0.0952381	0.323944	0.0510511	0.0162297	0.026455	-0.432827	0.0500717	0.826575	0.53115	0.458521	0.799512	0.765906	0.639333	-3.12914	-1.23442	-0.757613
Y2	CCRI 69	0.276976	0.201754	0.234039	0.395838	-0.278335	0.0793651	0.191257	-0.0526316	0.104551	0.0528053	-0.524718	-0.185719	0.797254	0.782911	0.428953	0.794926	0.754515	0.646545	-2.86291	-0.76266	-0.235917
Y3	CCRI 79	0.404381	0.205674	0.226415	0.397611	-0.0193638	0.456658	0.232877	0.049505	0.42003	0.351615	0.0910544	-0.576258	0.890522	-0.0983263	0.737179	0.868443	0.858892	0.482012	-3.56271	-0.9725	-0.329444
Y4	Huamian 3109	0.485564	0.333333	0.264978	0.549629	0.150156	0.398788	0.52862	0.120773	0.433155	0.348958	-0.28152	-0.538614	0.91518	0.380643	0.659898	0.902563	0.880875	0.717803	-4.38831	-2.02287	-1.17509
Y5	Lu 6269	0.434569	0.232456	0.00241546	0.524159	0.0315032	0.255814	0.48538	0.279012	0.303922	0.295659	-0.57782	-0.0286665	0.842212	0.616437	0.7054	0.815839	0.803068	0.413657	-2.57392	-0.0442409	-0.195872
Y6	Lumianyan 36	0.35792	0.189815	0.00943396	0.164446	-0.241427	-0.0980392	0.0980392	-0.023569	-0.0623886	-0.048951	-0.340373	0.034086	0.869793	0.732908	0.364597	0.855094	0.809357	0.762769	-4.49591	0.605984	-0.34295
Y7	K836-1	0.240297	0.101449	-0.00367751	0.303019	-0.296519	0.105105	0.293173	0.359788	0.156284	0.215777	-0.273658	-0.2403	0.737555	0.447277	0.635681	0.687908	0.700393	0.0820139	-1.6257	-0.326335	-0.277999
Y8	K836-2	0.498747	0.329167	0.12622	0.58137	-0.032208	0.323077	0.57672	0.328605	0.385013	0.365079	-0.661382	-0.145245	0.749543	0.379221	0.486599	0.719596	0.668132	0.420259	-0.912493	-0.48055	-0.367971
Coefficients of stress in 2016
No.	Cultivar	PH	LN	SPAD	LA	RL	LB	SB	RB	AB	TB	SLW	RSR	LPA	SPA	RPA	APA	TPA	PEC	PUE	MDAC	SC
Z1	Lu 54	0.384	0.2	-0.0150177	0.439697	0.0583596	0.193548	0.392857	0.253165	0.255556	0.254826	-0.471794	-0.343284	0.762289	0.615537	0.622112	0.736697	0.724478	0.2415	-1.78047	-0.50736	-0.504563
Z2	CCRI 50	0.293557	0.185185	0.0511974	0.299291	0.0522152	0.116916	0.253757	0.157378	0.133868	0.127296	-0.469218	-0.100878	0.681693	0.569496	0.30308	0.6611	0.629276	0.239592	-1.4522	-0.952704	-0.158513
Z3	Hannongmianzao 1	0.411324	0.173333	0.0121049	0.371942	-0.188324	0.126232	0.290993	0.192913	0.152482	0.150269	-0.413285	-0.080351	0.693309	0.587356	0.765243	0.67408	0.656318	0.233851	-1.64514	-0.654262	0.413338
Z4	Yu 068	0.341934	0.155556	0.0720562	0.34782	-0.134146	0.127098	0.25006	0.0168266	0.145646	0.117978	-0.469298	-0.320535	0.74218	0.599411	0.409022	0.715553	0.69804	0.24224	-2.30616	-1.81213	-0.256442
Z5	Lu 7619	0.291939	0.1	0.121611	0.254974	0.0599078	-0.121929	0.245892	0.281	-0.137834	0.157331	-0.348539	-0.188876	0.63027	0.583019	0.416492	0.628681	0.597512	0.234228	-0.783222	-1.05604	-0.084027
Z6	Yuzaomian 9110	0.180851	0.142857	0.274139	0.170976	-0.0411664	-0.0823529	0.0208333	-0.028169	-0.0451128	-0.0392157	-0.31687	0.144369	0.557658	0.545936	0.449858	0.553975	0.524267	0.2295	-1.17181	-0.162435	-0.24403
Z7	Deltapine	-0.214804	0.0962963	0.172147	-0.0604437	-0.11828	-0.118806	-0.112524	0.0436402	-0.108111	-0.059017	-0.404221	0.206276	0.563043	0.518287	0.223024	0.547479	0.504001	0.231327	-1.2964	-0.136324	0.0158048
Z8	De 0720	0.404251	0.166667	0.121993	0.427742	0.0465116	0.145098	0.298318	0.0720206	0.177661	0.149885	-0.392265	-0.357424	0.765523	0.588389	0.506683	0.725995	0.70621	0.241787	-2.22202	-1.1904	-0.603411
Y1	CCRI 88	0.216636	0.155556	0.323364	0.175607	-0.0888469	0.0925659	0.158369	0.198948	0.0810553	0.0989244	-0.346316	-0.230238	0.600544	0.567573	0.59821	0.59589	0.57213	0.22913	-1.20787	-0.431509	-0.221176
Y2	CCRI 69	0.285576	0.2	0.139296	0.295802	-0.0369181	0.0954375	0.127806	0.147833	0.0817459	0.0850697	-0.571676	-0.187332	0.644495	0.554325	0.295137	0.622392	0.577758	0.235165	-1.27779	-0.331083	-0.117027
Y3	CCRI 79	0.266114	0.1	0.184259	0.270809	0.0430108	0.109981	0.161176	0.13387	0.106509	0.0989585	-0.446465	-0.14114	0.706728	0.582672	0.497272	0.683466	0.660313	0.238371	-1.90234	-0.784501	0.0866596
Y4	Huamian 3109	0.398693	0.125926	-0.0613953	0.41919	0.204248	0.202044	0.401252	0.306847	0.268632	0.276078	-0.260616	-0.334561	0.754637	0.593844	0.577021	0.722356	0.706708	0.241023	-1.37506	-0.571364	-0.447287
Y5	Lu 6269	0.295421	0.102222	0.128186	0.162093	-0.13806	0.169691	0.0389302	0.0668034	0.157827	0.0839241	-0.763828	-0.298845	0.596016	0.524865	0.489784	0.582179	0.552877	0.230157	-1.6419	-1.05196	0.0238022
Y6	Lumianyan 36	0.287422	0.142857	0.312772	0.16986	-0.0918919	0.0989664	0.03516	0.0238168	0.0600004	0.0364144	-0.484372	-0.0913342	0.536155	0.574175	0.158455	0.562219	0.512881	0.233599	-1.23818	-0.371859	0.444681
Y7	K836-1	0.233905	0.104762	0.285456	0.202733	-0.080402	0.0834888	0.07814	0.00264629	0.0558701	0.0259005	-0.414803	-0.089635	0.586972	0.566216	0.0053315	0.58614	0.499597	0.236299	-1.09525	0.161837	-0.410699
Y8	K836-2	0.291138	0.155556	0.139295	0.403595	0	0.161825	0.310383	0.262274	0.200421	0.205896	-0.37243	-0.126567	0.703482	0.58278	0.52433	0.680249	0.659317	0.237671	-1.37174	-0.721866	0.743253

## Sheet: Table S3
Supplementary Table S3 Subjections value of low-phosphorus stress coefficient among 16 cultivars from nutrient solution culture in 2015 and 2016
Subjections value of low-phosphorus stress coefficient in 2015
No.	Cultivar	PH	LN	SPAD	LA	RL	LB	SB	RB	AB	TB	SLW	RSR	LPA	SPA	RPA	APA	TPA	PEC	PUE	MDAC	SC
Z1	Lu 54	0.883297	1	0.677388	0.993452	0.386534	0.883415	0.986081	0.505894	0.940446	0.919357	0.46035	0.648565	1	1	1	1	1	0.968302	1	0.153775	0.0275234
Z2	CCRI 50	0.66179	0.18288	0.531582	0.673432	0.118264	0.502225	0.553644	0.4613	0.537861	0.55889	0.342496	0.115389	0.871406	0.99364	0.70122	0.910106	0.870911	0.891193	0.521476	0.0272232	0.406663
Z3	Hannongmianzao 1	0	0.572093	0.309661	0.721495	0.202336	1	0.852309	0.661784	1	1	0.237628	0.616862	0.684318	0.790479	0.882587	0.713423	0.706089	0.182617	0.0934301	0.193709	0.177153
Z4	Yu 068	0.776933	0.236236	0.43786	0.908927	0.432097	0.789429	1	1	0.87942	0.976863	0.409467	0.0788077	0.801575	0.737226	0.825443	0.781113	0.751991	0.467651	0.140087	0.031519	0.198565
Z5	Lu 7619	0.663669	0.339261	0.327228	0.841309	0.0523663	0.66361	0.689058	0.632619	0.697196	0.733642	0.493773	0.165235	0.857522	0.150796	0.854238	0.801939	0.784895	0.515989	0.261553	0.134017	0.279437
Z6	Yuzaomian 9110	0.470725	0.210193	0.001872	0.310752	0.255616	0	0.358424	0.386355	0.0967054	0	0.501317	0.288641	0.912725	0.404212	0	0.848877	0.786753	1	0.535603	0.100718	0.0937784
Z7	Deltapine	0.22707	0.47892	0.13679	0	0.974189	0.0416253	0	0.790317	0.0383958	0.134938	0	0.400146	0	0	0.446105	0	0	0.200096	0	0.0465391	0
Z8	De 0720	0.723255	0.893023	0.157911	1	0.323674	0.846751	0.571148	0	0.820712	0.621488	0.545799	1	0.791199	0.855783	0.575719	0.810092	0.687431	0.748721	0.186891	0.609144	0.530241
Y1	CCRI 88	0.659165	0.839535	0.89807	0.300798	0	0.152348	0.446031	0.0856511	0	0.0288219	0.61542	0.0221097	0.772765	0.518359	0.401546	0.745473	0.700993	0.750409	0.36988	0.601521	0.639881
Y2	CCRI 69	0.52562	0.386291	0.882167	0.586777	0.935942	0.124882	0.223935	0.0890599	0.156483	0.0815376	0.77004	0.162221	0.719418	0.784626	0.346825	0.738043	0.681378	0.76012	0.333398	0.36309	0.189868
Y3	CCRI 79	0.798147	0.401385	0.853129	0.589758	0.0236226	0.777737	0.2936	0.0823166	0.715431	0.679328	0.0403316	0.565613	0.889111	0.0605976	0.917249	0.857131	0.861111	0.538583	0.429294	0.469144	0.270544
Y4	Huamian 3109	0.971802	0.893023	1	0.845424	0.484384	0.677601	0.788624	0.236023	0.738685	0.674014	0.36082	0.52673	0.933975	0.35918	0.774228	0.9124	0.898964	0.856065	0.542428	1	1
Y5	Lu 6269	0.862721	0.504529	0	0.802588	0.066388	0.430203	0.716249	0.577305	0.509716	0.567385	0.859393	0	0.801215	0.60856	0.858437	0.77192	0.764983	0.446545	0.293797	0	0.155326
Y6	Lumianyan 36	0.698763	0.34031	0.0267308	0.197618	0.805919	0.157195	0.067904	0.0263795	0.0817817	0.0738269	0.45985	0.00559787	0.851397	0.731741	0.227725	0.835507	0.775814	0.916611	0.557173	0.283906	0.282194
Y7	K836-1	0.447163	0	0.00480667	0.430672	1	0.169422	0.394525	0.751518	0.248141	0.407575	0.347592	0.218599	0.610802	0.429653	0.729411	0.56469	0.588182	0	0.16386	0.142571	0.226168
Y8	K836-2	1	0.876977	0.471526	0.898807	0.0688711	0.546593	0.869136	0.684264	0.65339	0.706265	1	0.120415	0.632613	0.357677	0.45351	0.61602	0.532631	0.455434	0.0661274	0.220511	0.303778
Subjections value of low-phosphorus stress coefficient in 2016
No.	Cultivar	PH	LN	SPAD	LA	RL	LB	SB	RB	AB	TB	SLW	RSR	LPA	SPA	RPA	APA	TPA	PEC	PUE	MDAC	SC
Z1	Lu 54	0.881445	1	0.00935797	1	0.285729	0.929021	0.977932	0.823529	0.941495	0.915055	0.41966	0.948965	0.985899	1	0.8105	1	1	0.943585	0.654819	0.221407	0.67188
Z2	CCRI 50	0.48902	0.857143	0.125594	0.629783	0.255646	0.288767	0.612283	0.508651	0.397079	0.405293	0.41454	0.074085	0.634517	0.526572	0.391819	0.600476	0.576654	0.798055	0.439268	0.487156	0.196176
Z3	Hannongmianzao 1	1	0.742857	0	0.821346	0.922034	0.3666	0.710165	0.625465	0.480358	0.497122	0.303389	0	0.68516	0.710217	1	0.669077	0.696905	0.36011	0.565954	0.309067	0.546476
Z4	Yu 068	0.698926	0.571429	0.192609	0.757743	0.65678	0.373836	0.602564	0.0466149	0.449774	0.36805	0.414699	0.866862	0.898227	0.834175	0.531234	0.888256	0.882436	1	1	1	0.330796
Z5	Lu 7619	0.481998	0.0357143	0.351814	0.512929	0.293309	0.33065	0.591608	0.915033	0.414821	0.525348	0.174724	0.391683	0.410323	0.665626	0.541064	0.429146	0.435409	0.388892	0	0.548819	0.0937829
Z6	Yuzaomian 9110	0	0.44898	0.841851	0.291448	0.201551	0	0	0.0839009	0	0.0532232	0.11179	0.231051	0.0937471	0.284307	0.585513	0.0343316	0.109702	0.0282312	0.255154	0.015581	0.313734
Z7	Deltapine	0.147317	0	0.514176	0	0.579097	0.304562	0.241026	0.134759	0.281848	0.132372	0.285376	0.454484	0.117225	0	0.28647	0	0.0195856	0.167599	0.336967	0	0
Z8	De 0720	0.969312	0.678571	0.353044	0.968478	0.227721	0.524228	0.72942	0.228054	0.593003	0.495585	0.261618	1	1	0.720837	0.659749	0.943444	0.918764	0.9655	0.94475	0.628996	0.807763
Y1	CCRI 88	0.155266	0.571429	1	0.303658	0.434994	0.085328	0.361538	0.645303	0.160802	0.291889	0.170305	0.540966	0.280722	0.506794	0.780193	0.255847	0.322541	0	0.278834	0.176145	0.282317
Y2	CCRI 69	0.454394	1	0.408634	0.620584	0.180751	0.10932	0.281197	0.477273	0.163892	0.236509	0.618148	0.386112	0.472339	0.370566	0.381368	0.395912	0.347565	0.460328	0.324748	0.116218	0.139147
Y3	CCRI 79	0.36995	0.0357143	0.553089	0.554683	0.210581	0.230826	0.368917	0.431373	0.27468	0.292025	0.369325	0.219397	0.743665	0.662048	0.647365	0.71868	0.71467	0.704906	0.734841	0.386784	0.0974018
Y4	Huamian 3109	0.945198	0.285714	0.158358	0.945929	1	1	1	1	1	1	0	0.917483	0.952538	0.77693	0.752311	0.924212	0.920981	0.907194	0.388614	0.2596	0.593144
Y5	Lu 6269	0.497109	0.0571429	0.37294	0.268025	0.67594	0.729693	0.0475709	0.210904	0.504268	0.23193	1	0.78858	0.260983	0.0676382	0.637512	0.183385	0.236927	0.0783157	0.563828	0.546382	0.0109938
Y6	Lumianyan 36	0.462404	0.44898	0.965969	0.288505	0.449903	0.138803	0.0376603	0.069594	0.0666054	0.042026	0.444655	0.03964	0	0.574679	0.201502	0.0779008	0.059072	0.340926	0.298736	0.14055	0.589562
Y7	K836-1	0.230196	0.0816327	0.878208	0.375182	0.393648	0.00948967	0.150641	0	0.048127	0	0.306405	0.0335072	0.221549	0.49284	0	0.204321	0	0.546857	0.204889	0.0152243	0.542848
Y8	K836-2	0.478527	0.571429	0.40863	0.904808	0	0.66398	0.761134	0.853476	0.694831	0.719473	0.2222	0.166799	0.729512	0.663162	0.682972	0.701677	0.710243	0.651519	0.386438	0.349409	1

## Sheet: Table S4
Supplementary Table S4 Correlation analysis of the subjection value of low-phosphorus stress coefficient among 16 cultivars from nutrient solution culture in 2015 and 2016
Correlation analysis in 2015
	PH	LN	SPAD	LA	RL	LB	SB	RB	AB	TB	SLW	RSR	LPA	SPA	RPA	APA	TPA	PEC	PUE	MDAC	SC
PH	1
LN	0.3902	1
SPAD	0.353	0.4313	1
LA	0.5200*	0.4093	0.2543	1
RL	-0.3413	-0.3037	-0.2119	-0.4536	1
LB	0.2279	0.4046	0.2624	0.8163**	-0.4731	1
SB	0.3735	0.3973	0.1996	0.8550**	-0.5083*	0.7468**	1
RB	-0.217	-0.2928	-0.3516	0.1282	0.0616	0.1276	0.4256	1
AB	0.2528	0.3468	0.1995	0.8694**	-0.4356	0.9789**	0.8132**	0.2511	1
TB	0.22	0.2469	0.1488	0.8154**	-0.3953	0.9348**	0.8344**	0.4393	0.9687**	1
SLW	0.4683	0.281	-0.0123	0.3667	-0.2355	-0.1266	0.308	-0.0925	-0.0634	-0.0899	1
RSR	-0.1244	0.4624	0.0982	0.3297	-0.0122	0.5584*	0.1456	-0.2306	0.5179*	0.3723	-0.3963	1
LPA	0.5352*	0.1082	0.2978	0.5287*	-0.4854	0.3916	0.4375	-0.3935	0.386	0.2797	0.2699	0.0328	1
SPA	0.0547	0.1283	0.018	0.3908	0.0002	0.2711	0.3529	-0.1397	0.2709	0.2048	0.2951	0.0735	0.4325	1
RPA	0.1813	0.147	0.242	0.6250**	-0.2848	0.7760**	0.6097*	0.3425	0.7742**	0.8445**	-0.2516	0.2905	0.2048	0.0873	1
APA	0.5117*	0.1426	0.3288	0.5601*	-0.4757	0.437	0.4509	-0.4156	0.4252	0.3097	0.2621	0.0757	0.9915**	0.5196*	0.2261	1
TPA	0.4824	0.0956	0.3471	0.5427*	-0.4582	0.4543	0.467	-0.3457	0.4459	0.3553	0.1779	0.06	0.9827**	0.4748	0.3287	0.9858**	1
PEC	0.4621	0.2828	0.3301	0.1092	-0.2068	-0.0474	-0.0081	-0.6228**	-0.0742	-0.2411	0.2282	0.036	0.6437**	0.3995	-0.3358	0.6619**	0.5920*	1
PUE	0.4043	0.2083	0.3227	0.1194	-0.1062	0.072	0.094	-0.4151	0.0582	-0.0295	-0.0094	0.096	0.6814**	0.3763	0.0635	0.6858**	0.7129**	0.7767**	1
MDAC	0.3146	0.5533*	0.5974*	0.1281	-0.0434	0.1592	-0.0211	-0.6722**	0.069	-0.0666	-0.0164	0.4006	0.2658	-0.1016	-0.0321	0.2728	0.2376	0.3212	0.1661	1
SC	0.4077	0.396	0.5019*	0.2143	-0.2137	0.1604	0.1516	-0.4623	0.099	0.0202	0.0828	0.1202	0.3291	-0.008	0.0338	0.3367	0.3018	0.3015	0.0874	0.8508**	1
R0.05=0.4973，R0.01=0.6226
Correlation analysis in 2016
	PH	LN	SPAD	LA	RL	LB	SB	RB	AB	TB	SLW	RSR	LPA	SPA	RPA	APA	TPA	PEC	PUE	MDAC	SC
PH	1
LN	0.4082	1
SPAD	-0.7695**	-0.3703	1
LA	0.8281**	0.5672*	-0.6896**	1
RL	0.4015	-0.2125	-0.2859	-0.0099	1
LB	0.6925**	0.0966	-0.6810**	0.6101*	0.3138	1
SB	0.7701**	0.4073	-0.7526**	0.8727**	0.146	0.7053**	1
RB	0.4047	0.2237	-0.4734	0.5528*	0.025	0.5517*	0.7329**	1
AB	0.7691**	0.216	-0.7685**	0.7539**	0.2719	0.9639**	0.8674**	0.6579**	1
TB	0.7220**	0.3228	-0.7121**	0.8183**	0.1627	0.8476**	0.9388**	0.8318**	0.9433**	1
SLW	0.0198	0.0519	-0.1244	-0.2045	0.0033	0.0646	-0.3847	-0.3436	-0.0955	-0.298	1
RSR	0.4576	0.0912	-0.3679	0.3601	0.2389	0.6457**	0.4215	0.1477	0.6132*	0.4932	0.0857	1
LPA	0.7931**	0.4212	-0.7517**	0.9226**	0.0639	0.6470**	0.8835**	0.4856	0.7884**	0.8024**	-0.1582	0.5196*	1
SPA	0.6734**	0.4264	-0.4222	0.8270**	-0.0039	0.3774	0.7657**	0.4786	0.5402*	0.6714**	-0.3643	0.2284	0.7582**	1
RPA	0.5214*	0.304	-0.4971	0.5409*	0.2406	0.5251*	0.5800*	0.6023*	0.5885*	0.6509**	-0.1581	0.3659	0.5603*	0.407	1
APA	0.8125**	0.4301	-0.7270**	0.9383**	0.0619	0.6362**	0.8918**	0.5022*	0.7808**	0.8104**	-0.1765	0.4849	0.9916**	0.8308**	0.5494*	1
TPA	0.8016**	0.4383	-0.7414**	0.9146**	0.0847	0.6691**	0.8914**	0.5428*	0.8042**	0.8367**	-0.1791	0.5239*	0.9792**	0.7962**	0.6650**	0.9837**	1
PEC	0.6742**	0.3414	-0.5915*	0.8060**	-0.0477	0.4885	0.7310**	0.2294	0.6151*	0.6030*	-0.1396	0.3789	0.8604**	0.7521**	0.0938	0.8768**	0.8000**	1
PUE	0.5560*	0.2837	-0.4538	0.4947	0.1242	0.3492	0.3438	-0.2161	0.3781	0.2296	0.2554	0.5134*	0.6732**	0.3793	0.3561	0.6500**	0.6606**	0.5953*	1
MDAC	0.4845	0.0651	-0.4995*	0.4269	0.1016	0.3131	0.3703	0.0309	0.3636	0.284	0.224	0.4293	0.5599*	0.3911	0.2783	0.5670*	0.5875*	0.5045*	0.6380**	1
SC	0.4818	0.3918	-0.1012	0.6546**	-0.1149	0.3642	0.5052*	0.226	0.4321	0.4703	-0.3704	0.0636	0.4377	0.6013*	0.2187	0.48	0.4375	0.4653	0.206	-0.0068	1
R0.05=0.4973，R0.01=0.6226

## Sheet: Table S5
Supplementary Table S5 The value of each cultivar's comprehensive index (CIn) and proportion, indice weight (IW), subjection value (Xnj), D and comprehensive evaluation of each cultivar' s phosphorus sensitivity
Comprehensive index (CIn) and proportion in 2015
		CI1	CI2	CI3	CI4	CI5	CI6	Eigenvector sum of squares
Eigen values	λ	5.4217	3.3609	2.2919	1.6169	1.1287	0.8042
Contributive ratio	(%)	31.8926	19.7698	13.4815	9.5114	6.6396	4.7303
Cumulative contributive ratio	(%)	31.8926	51.6624	65.1439	74.6553	81.2949	86.0252
Eigenvector
PH		0.6755	-0.1367	-0.27	-0.3488	-0.1915	0.0775	0.7122
LN		0.6465	-0.0677	0.3029	-0.2018	0.4356	-0.1185	0.7588
SPAD		0.5845	-0.2418	0.3084	-0.1235	-0.2948	0.3187	0.6989
LA		0.7755	0.5247	-0.1053	-0.0629	0.1474	0.0645	0.9176
RL		-0.5541	-0.2243	0.1523	0.2287	0.2555	0.6264	0.8905
LB		0.674	0.6163	0.2514	0.1956	0.0126	-0.08	0.942
SB		0.6569	0.6509	-0.1763	-0.1237	0.0636	0.0809	0.9122
RB		-0.3623	0.7998	-0.1646	-0.1365	-0.1003	0.1672	0.8546
SLW		0.2922	-0.0887	-0.6129	-0.5518	0.4057	0.0128	0.9381
RSR		0.3403	0.1367	0.6388	0.4497	0.3581	-0.2277	0.9249
LPA		0.7588	-0.1455	-0.3849	0.2285	-0.2517	-0.0755	0.8664
SPA		0.3906	0.0451	-0.4446	0.4413	0.4479	0.3099	0.8437
RPA		0.4224	0.7099	0.235	0.1522	-0.3066	0.1858	0.8893
PEC		0.5434	-0.6355	-0.3414	0.2719	0.0039	-0.1056	0.9008
PUE		0.518	-0.3903	-0.3001	0.5354	-0.2313	0.0527	0.8536
MDAC		0.5422	-0.5085	0.5883	-0.1988	0.0552	0.1099	0.9534
SC		0.5611	-0.3767	0.3727	-0.3661	-0.0828	0.1753	0.7673
Indice weight (IW), subjection value (Xnj), D and comprehensive evaluation of each cultivar' s phosphorus sensitivity in 2015
		CI1	CI2	CI3	CI4	CI5	CI6	X1j	X2j	X3j	X4j	X5j	X6j	D	Comprehensive evaluation
Z1		3.5788	1.0696	-0.9913	2.4749	0.4179	0.4165	0.972469	0.681795	0.248804	1	0.56408	0.659923	0.746596	Sensitive
Z2		0.603	-0.0649	-1.4783	1.1072	-0.962	0.3448	0.662606	0.496646	0.141405	0.752457	0.275065	0.637293	0.521417	Moderate
Z3		-0.4134	3.0194	1.5269	1.1981	0.9702	-0.4365	0.55677	1	0.804146	0.768909	0.679757	0.390702	0.721214	Sensitive
Z4		0.1302	2.798	-1.0933	-0.264	-0.5864	1.1118	0.613374	0.963868	0.226309	0.50428	0.353733	0.879371	0.615788	Moderate
Z5		0.1713	1.5526	-0.3119	-0.7367	-1.3065	-0.7645	0.617654	0.76062	0.398633	0.418725	0.202911	0.28718	0.544008	Moderate
Z6		-1.7702	-2.0511	-1.839	0.8723	-0.051	-1.6744	0.41549	0.172501	0.0618591	0.709942	0.465871	0	0.317826	Tolerant
Z7		-5.7604	0.1711	2.4054	-0.0154	0.3661	-0.0548	0	0.535161	0.997883	0.549275	0.553231	0.511173	0.41091	Tolerant
Z8		2.3541	-0.2793	1.576	0.4685	2.4992	-0.8822	0.844944	0.461656	0.814974	0.636857	1	0.250032	0.70841	Sensitive
Y1		0.8904	-2.6307	0.3753	-1.6493	-0.2955	-0.219	0.692532	0.0779111	0.550182	0.253552	0.414661	0.459349	0.44617	Tolerant
Y2		-0.7486	-2.2418	-0.6189	0.0034	0.9314	1.494	0.521867	0.141379	0.33093	0.552678	0.671631	1	0.445759	Tolerant
Y3		0.9948	-0.3159	2.1408	0.6804	-2.2753	-1.0835	0.703403	0.455683	0.93953	0.675209	0	0.186498	0.597648	Moderate
Y4		3.8432	-1.6086	2.415	-0.9058	-0.6322	1.1612	1	0.244716	1	0.38812	0.344141	0.894963	0.702376	Sensitive
Y5		0.102	1.516	-2.1195	-1.1484	0.072	-0.4656	0.610438	0.754647	0	0.344211	0.491633	0.381517	0.496721	Moderate
Y6		-1.4521	-3.1081	-1.3611	0.9293	0.172	0.1926	0.448613	0	0.167251	0.720258	0.512577	0.589256	0.344127	Tolerant
Y7		-3.393	1.0689	0.2974	0.0359	-0.2875	1.3108	0.246512	0.681681	0.533003	0.55856	0.416337	0.942179	0.477279	Moderate
Y8		0.8698	1.1048	-0.9236	-3.0502	0.9675	-0.4511	0.690387	0.68754	0.263734	0	0.679192	0.386094	0.52894	Moderate
IW								0.370736	0.229814	0.156716	0.110565	0.077182	0.0549874
Comprehensive index (CIn) and proportion in 2016
		CI1	CI2	CI3	CI4	CI5	CI6	Eigenvector sum of squares
Eigen values	λ	8.1471	2.2825	1.7473	1.0876	0.8677	0.7751
Contributive ratio	（%）	47.9239	13.4262	10.278	6.3978	5.1043	4.5591
Cumulative contributive ratio	（%）	47.9239	61.3501	71.6281	78.0259	83.1302	87.6893
Eigenvector
PH		0.892	0.1424	-0.0626	-0.0162	0.2662	-0.1892	0.9268
LN		0.475	-0.2157	0.37	0.5956	0.3048	0.0233	0.8573
SPAD		-0.7915	-0.2482	0.1909	-0.2512	0.0884	0.3343	0.9072
LA		0.9457	-0.1957	0.1575	0.0649	0.0276	-0.0303	0.9633
RL		0.1715	0.3649	-0.5909	-0.3345	0.469	-0.3119	0.9409
LB		0.7485	0.1721	-0.3965	-0.0219	0.0273	0.1699	0.7772
SB		0.9281	-0.2405	-0.156	-0.0376	-0.1156	-0.0667	0.9627
RB		0.5609	-0.4718	-0.524	0.2547	-0.2867	-0.0228	0.9593
SLW		-0.1514	0.7239	0.1499	0.4936	0.0906	-0.0757	0.827
RSR		0.5395	0.4496	-0.1703	-0.1664	-0.0632	0.5328	0.8378
LPA		0.9587	0.0353	0.112	-0.0347	-0.1377	0.0148	0.9533
SPA		0.7978	-0.3232	0.222	-0.1658	-0.0318	-0.0913	0.8271
RPA		0.6246	-0.0324	-0.4332	0.2708	0.0832	0.3074	0.7535
PEC		0.8037	0.0137	0.4048	-0.2436	-0.1625	-0.1769	0.9271
PUE		0.599	0.5548	0.3916	-0.0854	0.1299	0.1752	0.8748
MDAC		0.5428	0.5353	0.1995	-0.0981	-0.3459	-0.0762	0.756
SC		0.5294	-0.495	0.2862	-0.1923	0.4208	0.1858	0.8558
Indice weight (IW), subjection value (Xnj), D and comprehensive evaluation of each cultivar' s phosphorus sensitivity in 2016
		CI1	CI2	CI3	CI4	CI5	CI6	X1j	X2j	X3j	X4j	X5j	X6j	D	Comprehensive evaluation
Z1		4.7524	-0.5476	0.0655	1.0459	0.2594	0.7828	1	0.279636	0.600909	0.708047	0.609675	0.765834	0.786731	Sensitive
Z2		0.5033	-0.0606	1.0184	1.1944	-0.8608	-1.4776	0.509347	0.355589	0.81421	0.746671	0.332781	0.00794635	0.502507	Moderate
Z3		2.2988	-0.3775	-1.3065	0.8168	1.8385	-1.5013	0.716678	0.306165	0.293795	0.64846	1	0	0.578511	Moderate
Z4		2.7807	2.6407	1.645	-1.1692	-0.2988	-0.3171	0.772324	0.776884	0.95447	0.131918	0.471698	0.397049	0.710637	Sensitive
Z5		-0.4063	-0.9256	-1.5116	-0.2349	-2.2071	-0.6952	0.404314	0.220683	0.247885	0.374922	0	0.270277	0.325215	Tolerant
Z6		-3.9077	-1.1373	0.1972	0.1322	0.302	1.1056	0	0.187667	0.630389	0.470402	0.620205	0.874065	0.218487	Tolerant
Z7		-3.8887	0.9604	-1.3416	-0.7073	-0.0748	0.0061	0.00219397	0.514824	0.285938	0.252055	0.527066	0.505415	0.188886	Tolerant
Z8		3.6508	0.6937	1.8484	-0.7756	0.3099	1.2553	0.872796	0.473229	1	0.23429	0.622157	0.924258	0.768028	Sensitive
Y1		-2.1265	-1.2118	-1.0112	0.31	0.0684	1.4812	0.205679	0.176048	0.359896	0.516646	0.562463	1	0.303972	Tolerant
Y2		-1.1592	-0.0004	0.8986	2.1684	0.0022	-0.336	0.317375	0.364978	0.787393	1	0.546099	0.390712	0.446685	Moderate
Y3		-0.2441	0.4852	0.6533	-0.4227	-1.4003	-0.0209	0.423044	0.440712	0.732484	0.326077	0.199427	0.496362	0.445739	Moderate
Y4		4.1124	-0.7676	-2.619	-1.6764	0.3788	-0.1872	0.926098	0.245325	0	0	0.639188	0.440604	0.603806	Moderate
Y5		-1.7736	4.0713	-1.5591	0.9413	0.238	0.5864	0.246429	1	0.237252	0.680842	0.604385	0.699983	0.436845	Moderate
Y6		-3.0711	-0.5172	1.1658	-0.5393	1.4141	-0.4465	0.096604	0.284377	0.847204	0.29575	0.895096	0.353663	0.287705	Tolerant
Y7		-3.4103	-0.9652	1.3352	-1.5717	0.4487	-0.8442	0.0574358	0.214507	0.885123	0.0272316	0.656466	0.220319	0.219632	Tolerant
Y8		1.889	-2.3406	0.5218	0.488	-0.4182	0.6087	0.669357	0	0.703049	0.562942	0.442184	0.70746	0.551814	Moderate
IW								0.546519	0.153111	0.117209	0.0729599	0.0582089	0.0519915
